# Supplementary material
Source: HighWire-hosted journal article supplement (https://molpharm.aspetjournals.org/highwire/filestream/86943/field_highwire_adjunct_files/1/348_supp_document_2.xlsx)
Supplement: 348_supp_document_2.xlsx [file 348_supp_document_2.xlsx]

## Sheet: HDX Data Table
Naturally-Occurring Mutations to Muscle-type Creatine Kinase Impact its Canonical and Pharmacological Activities in a Substrate-Dependent Manner in vitro
Eric P. Mosher, Colten D. Eberhard, Namandjé N. Bumpus
Supplemental Document 2. HDX-MS Data Table
Tagged Construct		hCKM seq				Peptide monoisotopic mass (Da)	Peptide m/z		Uptake - WILDTYPE (%D)						Uptake - MUTANT (%D)						Uptake error (SD) - WILDTYPE (%D)						Uptake error (SD) - MUTANT (%D)
Start	End	Start	End	Sequence	Charge			Retention time (min)	1 sec	10 sec	100 sec	1,000 sec	10,000 sec	100,000 sec	1 sec	10 sec	100 sec	1,000 sec	10,000 sec	100,000 sec	1 sec	10 sec	100 sec	1,000 sec	10,000 sec	100,000 sec	1 sec	10 sec	100 sec	1,000 sec	10,000 sec	100,000 sec
1	38	-14	23	MHHHHHSSGLVPRGSMPFGNTHNKFKLNYKPEEEYPDL	5	4467.12	894.43	5.37	20.1936	20.7142	22.5533	23.0897	24.6537	19.7367	19.3401	22.298	24.437	25.3721	26.4618	23.9801	0.833893	1.76721	1.14776	0.823601	1.62132	2.50732	1.13278	1.42356	0.164195	0.833229	0.509198	0.120174
4	34	-11	19	HHHSSGLVPRGSMPFGNTHNKFKLNYKPEEE	5	3573.73	715.753	5.55	37.6781	51.3527	66.2759	69.8798	70.9698	70.2261	43.7565	58.4429	67.5062	69.6513	72.4747	71.0107	1.77167	2.77504	1.3618	0.748206	1.25616	0.20483	2.04354	1.49644	0.859567	0.653703	0.466126	0.721731
28	50	13	35	NYKPEEEYPDLSKHNNHMAKVLT	5	2756.32	552.271	5.7	30.9047	32.7712	36.3085	39.883	39.3605	40.11	21.463	24.324	25.5339	28.9842	33.9269	35.2438	1.65114	1.00999	1.56825	0.663312	1.47977	1.48932	1.0679	0.746282	0.4488	0.8904	2.10032	1.16542
46	53	31	38	AKVLTLEL	2	885.553	443.783	5.8	33.9929	39.3123	44.2656	54.5727	63.8003	66.3284	40.5394	44.1538	47.0545	58.8491	70.8252	79.0628	2.54992	2.10152	1.9159	0.953384	1.06594	0.78106	0.389264	1.03408	0.299486	0.817802	0.385785	1.06396
70	85	55	70	DVIQTGVDNPGHPFIM	2	1738.83	870.424	5.85	35.9085	39.0772	41.4102	44.4107	45.0108	44.0379	35.2347	38.8569	40.7126	43.5783	46.6916	49.7514	1.82579	2.13177	2.82741	1.11839	0.527468	1.19346	1.09179	0.253328	0.911708	0.409185	1.03507	0.532089
70	88	55	73	DVIQTGVDNPGHPFIMTVG	2	1995.97	998.993	5.8	43.4406	50.2315	54.1931	55.7867	57.1653	56.6937	46.4774	52.1199	54.8111	57.0503	60.0833	61.5903	2.209	2.08086	1.18461	0.861666	0.76452	0.647514	1.39245	0.888205	0.425451	0.28124	0.314092	0.287081
70	89	55	74	DVIQTGVDNPGHPFIMTVGC	2	2098.98	1050.5	5.85	45.2912	51.388	55.8686	57.0022	59.0422	58.2114	48.06	53.7906	57.7612	58.8354	62.5129	62.8129	2.15485	1.9507	1.2681	0.769816	0.808222	1.24955	1.4965	1.60151	0.313332	0.517929	0.828542	0.890061
89	96	74	81	CVAGDEES	1	808.291	809.298	4.967	33.3855	34.4703	36.1773	36.9116	37.6623	38.3981	35.2788	35.7589	35.8603	37.8167	38.7494	42.6204	1.88802	1.37274	0.673954	0.318997	0.132699	0.430875	0.00258272	0.564892	0.872972	0.484835	0.35221	0.195874
101	128	86	113	KELFDPIISDRHGGYKPTDKHKTDLNHE	5	3289.65	658.936	5.137	14.4174	15.3377	16.0226	17.0038	17.2525	17.1039	15.0953	15.548	16.1347	16.8337	17.8084	20.3531	0.529225	0.432829	0.506916	0.0845071	0.145316	0.494436	0.397358	0.198206	0.384619	0.255554	0.543998	0.539122
101	130	86	115	KELFDPIISDRHGGYKPTDKHKTDLNHENL	5	3516.77	704.362	5.183	13.4114	14.0316	14.822	16.3746	17.4349	16.3958	14.3592	14.6866	15.5811	16.7231	18.3427	22.033	1.63725	0.906149	0.243163	0.341818	0.937602	0.882789	0.583114	0.915966	0.501045	0.218071	0.788386	0.132048
101	140	86	125	KELFDPIISDRHGGYKPTDKHKTDLNHENLKGGDDLDPNY	5	4591.24	919.254	5.25	14.3991	15.4242	16.9471	19.3826	20.6798	19.6187	14.1256	14.798	16.3505	18.2898	20.7219	21.0061	1.48239	0.677627	0.485527	0.318766	0.622419	0.82507	0.288158	0.310705	0.443988	0.8323	0.818765	0.288238
101	142	86	127	KELFDPIISDRHGGYKPTDKHKTDLNHENLKGGDDLDPNYVL	5	4803.39	961.685	5.4	17.2412	17.9337	19.8644	22.4561	23.7265	24.9159	17.0476	17.7462	18.6869	21.093	23.3926	26.9661	1.03464	0.712459	0.613757	0.530088	0.683652	0.527282	0.248527	0.0541477	0.556936	0.198085	0.1832	0.20236
101	144	86	129	KELFDPIISDRHGGYKPTDKHKTDLNHENLKGGDDLDPNYVLSS	5	4977.45	996.497	5.4	19.2764	20.5509	22.2824	25.2017	27.1119	28.0706	19.7684	20.3396	21.0976	23.8462	26.5725	29.6979	0.738986	0.431798	0.535283	0.526021	1.1677	1.30149	0.345586	0.298048	0.590022	0.408882	0.434221	0.697193
129	142	114	127	NLKGGDDLDPNYVL	2	1531.75	766.883	5.7	26.6518	26.8596	29.6849	33.7691	36.4664	37.5018	28.5942	29.1618	30.5675	35.6452	38.7578	42.6489	0.930267	0.821928	1.16504	0.71081	0.93011	1.7003	0.953145	0.810035	1.20964	0.414393	0.736561	0.737552
135	142	120	127	DLDPNYVL	1	947.46	948.467	5.95	26.1676	28.5003	31.5729	33.0422	40.2008	42.6605	28.3435	29.6246	29.2384	33.3638	39.0606	49.1429	1.53099	0.599997	8.22615	2.7715	4.41178	10.2234	1.44264	2.77123	2.67439	5.17037	3.14181	3.94255
145	172	130	157	RVRTGRSIKGYTLPPHCSRGERRAVEKL	5	3221.78	645.363	5.03	20.2149	19.982	20.6424	20.9048	21.6091	22.7361	23.9152	24.2927	21.7749	23.7317	24.4439	31.6312	1.17285	1.29267	0.196569	0.754571	0.112092	0.710102	0.665802	2.25184	1.23282	0.663576	1.42334	1.72041
145	174	130	159	RVRTGRSIKGYTLPPHCSRGERRAVEKLSV	5	3407.88	682.583	5.071	19.8386	20.2673	20.9982	19.65	20.2996	20.9685	22.084	23.1122	22.3758	23.0633	24.3615	30.3277	0.627343	0.744054	0.814526	1.20571	1.01428	0.951794	0.29897	0.414988	0.907661	0.116309	0.268719	0.276012
178	202	163	187	NSLTGEFKGKYYPLKSMTEKEQQQL	3	2946.48	983.167	5.45	38.7427	48.3234	57.8853	60.7142	62.9212	62.2121	42.1008	52.6397	59.3337	60.906	64.7397	62.7976	2.59792	2.11812	1.05387	0.811466	1.31256	0.929502	1.39567	1.26049	0.833026	0.298927	0.208274	0.492232
178	202	163	187	NSLTGEFKGKYYPLKSMTEKEQQQL	5	2946.48	590.303	5.45	49.791	55.2178	57.5623	57.4113	59.0818	58.5712	40.7606	50.8205	57.4825	59.2453	62.7137	60.3648	4.71228	1.62178	0.973492	0.796453	0.439583	0.285766	1.40584	1.09183	0.740618	0.825966	1.01412	0.659727
178	207	163	192	NSLTGEFKGKYYPLKSMTEKEQQQLIDDHF	3	3573.74	1192.25	5.6	36.0314	49.0533	63.4096	66.6674	67.5616	66.9975	40.8775	55.2865	63.2447	65.8165	67.7644	67.7487	1.47303	2.60677	0.801466	1.3298	1.7981	0.689034	2.33823	1.48097	0.917994	1.09213	1.17599	0.82656
178	207	163	192	NSLTGEFKGKYYPLKSMTEKEQQQLIDDHF	5	3573.74	715.756	5.55	36.0731	49.1798	63.4464	66.9285	67.8577	67.1193	42.165	56.2515	65.0229	67.0318	69.7491	68.3579	1.8072	2.83509	1.56683	0.81684	1.32785	0.231367	1.90574	1.43602	0.78716	0.625654	0.447804	0.702761
178	208	163	193	NSLTGEFKGKYYPLKSMTEKEQQQLIDDHFL	3	3686.83	1229.95	5.65	33.8163	48.4241	63.4549	68.0413	68.2347	67.0035	41.0591	56.2899	65.5804	68.4232	70	69.0947	1.93971	3.21033	1.51043	0.874517	0.842427	0.813193	2.02716	1.54337	1.15372	0.563389	1.43825	0.972772
178	208	163	193	NSLTGEFKGKYYPLKSMTEKEQQQLIDDHFL	5	3686.83	738.372	5.65	34.6005	49.1913	64.217	68.327	69.2713	68.2608	42.2328	57.2917	65.8982	68.7409	70.9627	70.0072	2.00983	3.08788	1.70411	0.66145	1.62513	0.443464	2.04036	1.15516	0.654129	0.383489	0.732816	0.725827
203	217	188	202	IDDHFLFDKPVSPLL	2	1754.92	878.469	5.95	33.0355	45.4694	51.3335	54.3526	55.2659	47.9017	45.7606	51.9369	52.8969	53.6156	52.4663	51.5837	2.68217	4.06865	2.33941	5.6179	5.69434	0.547628	3.18335	1.93335	1.76747	1.23757	0.539901	0.725857
203	217	188	202	IDDHFLFDKPVSPLL	3	1754.92	585.981	5.9	37.8493	49.899	54.6774	55.7637	53.8014	54.9161	46.7419	49.8206	52.0694	52.9548	53.0042	51.9286	1.51025	2.36354	0.470995	0.550554	1.70754	0.591518	2.79024	0.502189	0.974605	0.373289	0.656028	0.164949
203	218	188	203	IDDHFLFDKPVSPLLL	3	1868.01	623.676	6.05	54.3748	59.5514	66.2885	68.4192	68.4955	67.833	50.9252	56.4409	58.7773	59.3229	60.5452	58.2009	6.8051	4.91048	1.53668	2.93603	6.41299	3.35941	2.95207	0.633452	1.18585	0.635061	1.97023	1.13003
206	217	191	202	HFLFDKPVSPLL	3	1411.79	471.602	5.85	46.4127	57.1191	62.6506	65.7159	62.5472	64.6293	49.7861	54.4869	60.6102	56.839	56.4727	53.7594	4.08782	4.64042	1.62753	5.06956	2.27275	4.99125	4.01603	0.646684	3.48743	0.22085	2.16722	2.84199
208	217	193	202	LFDKPVSPLL	1	1127.66	1128.67	5.9	36.6779	57.2038	65.9751	67.4147	66.1699	63.5415	53.1605	58.7713	61.6744	64.4137	64.0619	63.3793	1.68183	4.52544	1.20784	0.872443	1.17416	1.00506	5.24411	2.40823	1.85476	0.993823	1.03271	0.726213
208	217	193	202	LFDKPVSPLL	2	1127.66	564.836	5.9	37.8309	58.0873	66.5127	68.3843	67.0305	64.6456	53.7747	59.4667	62.8021	64.7599	64.4638	63.9698	2.25207	4.82491	1.80571	0.764546	1.36857	0.380521	4.40947	1.23248	0.967554	1.06567	1.68841	0.531836
208	218	193	203	LFDKPVSPLLL	1	1240.74	1241.75	6.05	37.5555	53.7768	64.0654	68.2707	66.7675	64.086	56.2848	62.6812	64.9081	67.2006	65.8266	65.6009	2.48365	5.79755	4.04519	2.31619	2.82003	3.11669	5.13824	3.83657	0.750245	0.224147	1.10681	1.19352
208	218	193	203	LFDKPVSPLLL	2	1240.74	621.378	6.05	34.0481	53.4951	62.186	63.6749	63.3491	60.662	55.9865	62.5139	65.5618	67.6106	67.1195	66.3472	2.19803	4.34278	2.00013	1.3358	1.37926	0.608164	4.36113	1.42034	0.983767	0.330773	1.41343	0.83357
209	217	194	202	FDKPVSPLL	1	1014.57	1015.58	5.75	38.9019	60.1083	68.5116	70.3846	70.5907	65.4103	59.6276	64.3686	68.5487	70.4677	69.8771	69.7757	3.50185	4.60853	3.00863	0.865251	3.23365	0.80606	5.68224	1.9994	1.48134	0.66562	2.15377	1.822
209	217	194	202	FDKPVSPLL	2	1014.57	508.294	5.75	41.4109	63.0714	70.4155	72.7897	71.8792	69.1023	58.6142	64.8514	67.7545	69.9911	69.9766	69.3717	2.34973	5.30693	2.10748	0.631696	1.68872	1.0178	5.0063	1.25716	1.25299	0.958945	1.66493	0.750425
209	218	194	203	FDKPVSPLLL	1	1127.66	1128.67	5.9	36.7285	57.2899	66.077	67.4373	66.1699	63.6835	55.0548	61.7559	64.4369	67.1059	66.9313	65.5404	1.75237	4.57984	1.25317	0.900247	1.17416	0.770169	5.42307	1.78868	1.30139	1.24657	1.93496	0.803349
209	218	194	203	FDKPVSPLLL	2	1127.66	564.836	5.9	37.8309	58.0873	66.5127	68.3843	67.0305	64.6456	54.8634	61.1189	64.2845	66.4336	66.2267	65.3869	2.25207	4.82491	1.80571	0.764546	1.36857	0.380521	4.55593	1.27271	1.15446	1.03675	2.24901	0.759504
211	218	196	203	KPVSPLLL	2	865.564	433.789	5.87	41.183	67.2869	78.8931	83.2738	81.31	79.0646	68.0278	75.5979	77.8652	79.6383	81.5658	79.0569	3.78656	8.7819	3.60965	1.42076	3.37693	2.69326	8.62544	2.04319	1.04361	1.49353	1.20442	0.988093
218	240	203	225	LASGMARDWPDARGIWHNDNKSF	3	2643.24	882.087	5.6	27.1989	28.9324	31.2691	34.4755	33.945	35.5702							1.70563	1.43473	1.69692	0.671007	1.42198	1.47177
218	240	203	225	LASGMARDRPDARGIWHNDNKSF	3	2613.26	872.094	5.21							23.991	25.0549	26.0572	27.9111	28.9017	30.9515							0.308788	0.324876	0.272167	0.0327769	0.681138	0.496379
218	240	203	225	LASGMARDWPDARGIWHNDNKSF	5	2643.24	529.655	5.55	28.8584	30.9965	34.8097	36.9182	37.664	39.5877							0.967829	0.644767	0.645692	0.303493	0.585073	0.378959
218	240	203	225	LASGMARDRPDARGIWHNDNKSF	5	2613.26	523.659	5.202							24.2316	25.6265	27.1322	28.5499	29.9745	32.3149							0.540635	0.0753293	0.288145	0.412372	0.231923	0.374564
218	241	203	226	LASGMARDWPDARGIWHNDNKSFL	5	2756.32	552.272	5.67	27.121	28.5734	31.5805	34.9278	34.3038	34.7213							1.87231	1.36029	1.83367	0.829613	1.47267	1.63163
218	241	203	226	LASGMARDRPDARGIWHNDNKSFL	5	2726.35	546.276	5.295							23.5658	24.6646	25.9448	28.0341	28.8705	31.2309							0.0994291	0.409904	0.30438	0.328008	0.425995	0.0256166
219	240	204	225	ASGMARDWPDARGIWHNDNKSF	5	2530.16	507.038	5.55	29.2712	30.5123	33.0295	34.9687	34.8798	36.5655							1.11969	1.12464	1.14656	0.197735	1.43406	1.21181
219	240	204	225	ASGMARDRPDARGIWHNDNKSF	5	2500.18	501.042	5.164							23.6511	25.0065	26.3402	28.06	29.4058	31.9229							0.281449	0.131231	0.289744	0.2744	0.0800547	0.375016
219	241	204	226	ASGMARDWPDARGIWHNDNKSFL	3	2643.24	882.087	5.58	26.9215	28.6026	31.2401	33.9969	33.8221	35.7144							1.60835	1.38277	1.62556	0.594353	1.25192	1.42043
219	241	204	226	ASGMARDRPDARGIWHNDNKSFL	3	2613.26	872.094	5.21							23.991	25.0549	26.0572	27.9111	28.9017	30.9515							0.308788	0.324876	0.272167	0.0327769	0.681138	0.496379
219	241	204	226	ASGMARDWPDARGIWHNDNKSFL	5	2643.24	529.655	5.58	27.4194	29.249	32.0893	34.8075	34.7596	36.1523							1.5951	1.40827	1.68022	0.357879	1.12646	1.02235
219	241	204	226	ASGMARDRPDARGIWHNDNKSFL	5	2613.26	523.659	5.202							24.2316	25.6265	27.1322	28.5499	29.9745	32.3149							0.540635	0.0753293	0.288145	0.412372	0.231923	0.374564
222	241	207	226	MARDWPDARGIWHNDNKSFL	5	2428.15	486.637	5.65	25.6631	25.6604	28.5241	30.6955	32.0558	32.3779							1.80096	1.97857	2.3754	1.64234	1.06867	2.13644
222	241	207	226	MARDRPDARGIWHNDNKSFL	5	2398.17	480.641	5.286							23.7086	24.0431	25.0093	27.8296	28.3416	32.8301							1.30526	2.06879	1.47415	0.732752	1.16351	1.63125
223	240	208	225	ARDWPDARGIWHNDNKSF	3	2184.02	729.015	5.5	35.3491	33.8372	33.9378	34.3303	34.0928	39.8502							1.98838	0.439302	0.39892	0.462388	0.986763	4.0618
223	240	208	225	ARDRPDARGIWHNDNKSF	5	2154.05	431.816	5.15							22.5756	24.0953	24.9615	26.3521	30.2061	33.9249							0.837878	0.995313	0.945116	0.224097	1.06119	2.45248
241	246	226	231	LVWVNE	1	758.396	759.403	5.8	28.88	27.9268	28.8778	30.5785	32.8458	32.4232	34.2815	34.3925	34.7704	35.7392	38.2634	45.1551	2.8684	2.05073	1.6576	0.338746	0.219041	0.4186	0.124165	0.65564	1.07843	1.42521	1.26023	0.196038
241	250	226	235	LVWVNEEDHL	1	1252.61	1253.62	5.8	25.3826	24.9369	27.5385	28.7904	30.6566	29.4548	30.1473	30.4263	31.8169	34.6434	34.8964	38.1422	1.97179	2.6456	2.00084	0.637626	0.123618	1.00909	2.4097	1.3975	2.89528	1.0019	1.11595	0.426998
241	250	226	235	LVWVNEEDHL	2	1252.61	627.311	5.8	26.2818	26.5936	28.6769	30.1128	31.1231	30.1071	27.7397	28.9256	28.5918	30.2903	31.7018	35.2878	2.14569	1.74157	1.38087	0.658347	0.0336178	0.820959	0.207343	0.278541	1.25488	0.344816	0.285444	0.342676
241	252	226	237	LVWVNEEDHLRV	2	1507.78	754.896	5.65	25.7807	24.7788	25.858	26.2193	29.1767	26.9691	30.0506	30.8536	30.6834	31.7046	32.2317	35.6579	2.14577	2.38957	1.65811	1.82205	1.29453	1.36968	0.487395	0.702582	0.440397	1.11299	1.27995	0.356726
251	261	236	246	RVISMEKGGNM	2	1220.6	611.307	5.118	26.3061	28.3546	28.585	29.7788	31.7795	31.0253	27.1868	27.9868	27.8229	29.4806	30.7146	31.7027	1.00097	3.31614	1.22215	0.432219	0.565851	0.538481	1.24252	0.372289	0.973098	0.531017	1.97557	0.397709
251	265	236	250	RVISMEKGGNMKEVF	3	1723.87	575.632	5.4	26.4006	26.6465	27.8506	31.1783	33.0307	35.2141	23.5476	23.7852	23.8357	26.5852	29.3525	31.9485	1.75794	1.36148	1.31339	0.910016	2.03051	2.03984	0.814663	0.383633	1.38982	0.0634261	0.527473	0.704188
251	268	236	253	RVISMEKGGNMKEVFRRF	5	2183.15	437.636	5.35	25.6151	25.7245	27.3182	29.145	31.1779	32.7033	26.9793	27.7401	28.124	30.2016	32.4028	31.5397	1.67504	1.12814	0.815216	0.654693	0.990243	0.69951	1.35078	0.389987	1.4317	0.921944	1.50016	0.396742
251	271	236	256	RVISMEKGGNMKEVFRRFCVG	3	2442.24	815.088	5.55	26.2747	25.2819	26.0995	25.6157	26.828	30.6334	28.9842	30.8319	28.3317	32.2482	33.0796	34.5844	2.3504	2.51657	2.47097	2.85121	3.89345	0.984477	1.09108	0.245779	2.17334	2.0247	0.832347	0.446679
251	271	236	256	RVISMEKGGNMKEVFRRFCVG	5	2442.24	489.456	5.55	28.6449	28.5357	30.3734	32.6671	34.1339	35.9427	28.2264	28.8985	28.6237	31.1247	33.2321	34.5198	1.95342	1.79113	1.06184	0.781489	0.84196	1.56824	0.704006	0.436579	1.26987	0.710302	0.724275	0.626216
251	272	236	257	RVISMEKGGNMKEVFRRFCVGL	5	2555.33	512.072	5.75	29.1653	27.6121	27.1957	30.0692	32.095	34.0806	28.9764	28.7165	27.1304	31.5533	32.4717	36.5839	2.49808	1.98433	3.1995	2.88638	1.14108	3.16096	2.50117	1.0356	2.33943	2.86661	1.58634	0.564157
253	261	238	246	ISMEKGGNM	2	965.431	483.722	5.2	32.9791	34.137	37.0727	39.1196	40.0518	40.3082	35.6141	37.1602	36.8485	39.6658	40.4102	42.6919	2.23356	1.291	2.03822	1.26987	2.19123	2.25796	0.753948	1.40123	2.32864	2.14916	1.28328	1.82866
253	265	238	250	ISMEKGGNMKEVF	3	1468.71	490.575	5.47	30.3277	29.918	31.5777	33.8829	35.0516	38.0712	26.2408	25.9719	25.4268	28.9605	31.8602	35.035	1.61765	2.33108	2.72615	1.29926	1.64795	1.18442	0.88711	0.157901	0.640176	0.87267	0.839834	0.313459
253	271	238	256	ISMEKGGNMKEVFRRFCVG	3	2187.08	730.032	5.2	28.0196	31.7812	39.5775	42.1902	42.8017	41.1339	30.5752	34.8733	41.886	44.1514	45.2094	45.0268	1.96278	0.97977	1.10032	0.459318	0.806046	0.478422	0.167677	0.856302	0.361046	0.268547	0.670868	0.534108
255	265	240	250	MEKGGNMKEVF	3	1268.59	423.87	5.4	28.9831	29.4218	31.996	35.2529	38.306	40.6126	27.3129	27.6813	27.0346	31.4188	34.0929	37.4559	2.18624	1.22351	2.60902	1.06658	0.715962	1.99713	1.16185	0.403165	0.962686	0.361423	0.836322	0.371698
256	265	241	250	EKGGNMKEVF	2	1137.55	569.781	5.38	33.1313	31.4897	30.7291	36.2154	36.4865	41.6893	26.2292	29.1878	27.5033	29.992	33.6392	36.3892	1.36219	4.52435	1.90305	2.41147	3.5818	3.77849	0.578106	4.08653	1.74807	0.101106	0.0509155	0.512361
256	268	241	253	EKGGNMKEVFRRF	3	1596.82	533.28	5.35	25.3322	24.6047	27.2041	29.3559	32.9111	29.2881	24.2182	23.6923	23.5809	25.3556	26.5969	25.2492	2.89759	2.66512	0.812877	1.96162	0.164169	2.14054	1.37983	0.362565	2.93784	0.982022	1.3837	3.50757
256	271	241	256	EKGGNMKEVFRRFCVG	3	1855.92	619.646	5.52	29.495	29.4167	31.4044	32.4663	35.3652	37.6534	30.63	30.8727	30.5263	32.8159	35.6329	37.49	2.27134	2.20771	1.08035	0.711415	0.354027	0.847027	1.62885	0.510916	1.4007	1.1627	0.816323	0.502258
266	277	251	262	RRFCVGLQKIEE	3	1476.79	493.269	5.35	24.2247	24.081	24.2518	24.8726	25.3687	29.7877	25.0786	24.4928	22.8855	25.7027	26.1683	29.1848	1.53389	1.66033	0.7021	0.343869	1.36429	2.23773	0.565349	0.244375	1.27403	1.014	1.32243	0.726202
272	277	257	262	LQKIEE	1	758.417	759.424	5.071	30.0146	28.884	32.6402	33.3334	41.4242	43.6686	33.723	32.6515	32.3	35.3104	41.7954	43.8651	2.08563	2.37814	1.34613	1.23402	0.135291	0.412545	0.394346	0.733196	2.65029	0.810816	0.423471	0.363389
278	294	263	279	IFKKAGHPFMWNQHLGY	2	2073.04	1037.53	5.47	20.2147	22.0575	24.6595	27.9713	28.4216	28.4372	17.7369	20.3079	21.9092	25.0118	27.46	29.5345	1.61509	1.86387	2.3212	1.2851	2.29837	2.37253	0.732771	0.327309	0.896694	0.558091	0.442721	1.35717
278	294	263	279	IFKKAGHPFMWNQHLGY	3	2073.04	692.02	5.47	20.7611	22.3244	24.5975	28.0839	27.9441	28.209	18.8851	21.2858	22.5901	24.8492	27.2109	29.0677	1.40591	1.47799	2.66954	1.10631	1.83648	1.89878	0.631862	0.554969	0.456927	0.239115	0.161759	0.472137
278	294	263	279	IFKKAGHPFMWNQHLGY	5	2073.04	415.615	5.5	24.041	25.2886	27.6295	30.6875	31.1232	31.9062	18.013	20.2527	23.0233	23.795	27.2505	27.8338	1.36846	1.06713	1.88692	0.488568	2.1084	1.55334	0.767187	0.743567	1.07319	0.0949304	1.09161	0.353128
278	296	263	281	IFKKAGHPFMWNQHLGYVL	3	2285.19	762.738	5.65	22.1028	23.3547	25.2092	27.9251	28.3208	28.7666	25.8357	28.0229	29.3744	31.6272	33.7274	41.8977	1.37355	1.54606	1.24859	0.651027	1.51349	2.13663	1.0351	0.419473	0.911305	0.684048	0.598294	0.708613
278	296	263	281	IFKKAGHPFMWNQHLGYVL	5	2285.19	458.045	5.68	27.7252	30.0775	33.24	36.6146	36.6941	37.7814	22.9195	25.2498	26.6474	29.8718	32.4381	38.7409	1.05348	1.45576	2.14512	0.302222	1.13714	2.87831	0.66791	0.375852	1.00394	0.253248	1.01851	0.558924
299	327	284	312	PSNLGTGLRGGVHVKLAHLSKHPKFEEIL	5	3133.75	627.757	5.38	21.03	22.3189	24.2906	25.9465	26.2844	29.8053	21.438	22.1854	22.7124	24.6256	25.6047	28.8769	0.538688	0.61524	0.30033	0.483949	1.44031	1.41004	0.15877	0.684058	0.434849	0.384898	0.146783	0.942901
303	323	288	308	GTGLRGGVHVKLAHLSKHPKF	5	2238.29	448.664	8.97	14.8146	14.7531	16.2836	18.4385	20.6446	21.6906	19.6066	20.1473	20.5583	23.0584	24.519	27.6769	1.14455	0.585815	0.832684	0.101552	0.714772	2.27297	0.271095	0.212669	0.454782	0.201723	0.722986	0.351473
303	327	288	312	GTGLRGGVHVKLAHLSKHPKFEEIL	3	2722.54	908.52	5.32	21.3275	21.7449	23.1928	25.2321	25.6781	28.3363	23.4622	24.2912	24.6811	28.5982	28.4322	31.9768	1.50806	0.597332	0.735386	1.73038	1.07097	0.707368	1.65312	0.905834	2.77053	1.43536	2.28773	1.04875
303	327	288	312	GTGLRGGVHVKLAHLSKHPKFEEIL	5	2722.54	545.515	5.32	20.8944	22.2606	24.1932	26.2976	27.3295	30.4284	20.819	21.6134	21.7936	23.8844	25.5838	28.0526	1.3029	0.778917	1.10693	0.47943	0.993096	0.476122	0.294039	0.211589	0.829876	0.697359	0.0782817	0.181404
307	327	292	312	RGGVHVKLAHLSKHPKFEEIL	5	2394.36	479.88	5.27	15.1549	16.5825	19.5846	20.6271	20.6309	22.3232	18.009	18.757	21.3733	21.0265	21.9176	24.2794	2.472	2.1492	1.25209	0.937547	1.06389	1.31215	0.540439	0.225106	2.71886	0.725004	1.11551	0.751361
315	327	300	312	AHLSKHPKFEEIL	3	1547.85	516.955	5.38	6.69309	8.24882	9.68844	9.3445	10.7101	10.3546	15.9591	17.1761	16.659	18.5827	18.887	19.1653	1.80358	1.40801	1.75532	0.790917	0.714312	1.14393	0.302863	1.10382	0.485668	0.61936	1.47977	0.483513
331	349	316	334	RLQKRGTGGVDTAAVGSVF	3	1918.04	640.353	5.4	41.2438	44.7039	46.1671	47.304	45.9434	43.9416	43.4062	46.1865	48.159	48.7796	50.2186	48.4487	1.76133	2.63112	1.96886	0.569077	2.17641	1.34797	1.3119	0.62183	0.564719	0.218806	0.52727	0.520872
333	349	318	334	QKRGTGGVDTAAVGSVF	3	1648.85	550.624	5.5	45.0601	49.1882	52.0061	53.7794	53.3125	51.7204	45.5013	48.3072	50.8991	51.8173	52.5654	51.4844	2.27151	2.56872	2.09347	0.758768	1.21069	0.264925	1.36074	0.307322	0.742933	0.328911	0.679894	0.028025
343	349	328	334	AAVGSVF	1	649.343	650.35	5.78	44.0538	53.8059	59.348	64.9999	65.1793	59.968	48.1046	55.1517	58.5293	62.2387	66.0864	65.7473	3.971	3.87709	1.58443	1.08889	1.79145	4.54229	1.35665	1.18365	1.4427	1.25453	0.446902	1.93851
343	371	328	356	AAVGSVFDVSNADRLGSSEVEQVQLVVDG	3	2946.46	983.159	5.43	31.1502	38.935	47.4485	48.2614	51.273	49.3191	34.4681	43.2167	48.7976	50.0101	53.2422	51.4555	2.35799	1.86323	1.46907	0.202298	0.691303	1.38502	0.989724	1.17418	0.694384	0.302112	0.225421	0.381986
350	360	335	345	DVSNADRLGSS	2	1119.52	560.765	5.071	40.8135	42.2578	43.5821	47.5561	48.0158	49.1865	36.4685	40.5729	40.2676	47.1711	45.1295	48.38	1.01939	0.944142	2.22757	0.653085	1.57579	0.921171	1.87918	1.08921	0.201381	2.02245	0.678234	2.28862
350	361	335	346	DVSNADRLGSSE	2	1248.56	625.286	5.11	33.816	35.8851	41.3475	47.6561	48.814	47.1754	31.4923	33.64	37.4804	43.4581	44.3211	44.9172	1.54172	1.21865	0.589464	0.580074	0.658105	0.497074	0.180434	0.555209	0.324854	0.463066	0.442918	0.38336
350	363	335	348	DVSNADRLGSSEVE	2	1476.67	739.341	5.25	34.6739	35.5674	39.0199	45.1819	44.518	44.2329	31.8518	34.2127	37.0004	41.9361	43.1211	44.6789	1.45221	1.68961	0.480729	1.07457	1.6471	1.21797	0.547064	1.01435	0.673173	0.708933	0.114919	0.504447
350	364	335	349	DVSNADRLGSSEVEQ	2	1604.73	803.371	5.137	30.3951	32.0661	36.1148	40.2262	41.4313	39.497	32.0479	33.7189	36.6364	41.5136	42.5882	44.655	2.8275	1.83191	1.32974	1.12639	0.499602	1.00107	0.605935	0.192477	0.558489	0.298707	0.0707741	0.190148
350	367	335	352	DVSNADRLGSSEVEQVQL	2	1944.94	973.476	5.62	32.0682	32.7197	34.2583	36.3999	32.3999	36.4593	32.0545	33.7569	32.3584	37.3275	34.0151	41.6586	2.14298	1.76571	2.48294	1.29828	1.37129	1.72003	1.30749	1.01805	0.835017	1.75216	4.22815	1.26326
355	363	340	348	DRLGSSEVE	2	990.462	496.238	5.1	27.8849	26.2971	28.2397	30.5345	30.6296	32.5288	29.5045	31.2117	29.7457	36.9145	36.9362	40.883	0.428911	1.59479	0.727503	0.733499	0.821856	1.30364	1.91596	0.322149	1.98247	1.58326	1.69676	2.48554
355	364	340	349	DRLGSSEVEQ	2	1118.52	560.267	5.07	49.2252	51.6816	53.2968	53.973	59.7417	58.9555	48.5283	51.3297	53.022	60.8172	59.685	63.1574	1.75382	1.73994	1.24068	9.80013	0.767696	0.620006	1.5992	0.949349	0.980882	1.29273	1.18357	1.72198
364	374	349	359	QVQLVVDGVKL	2	1196.71	599.363	5.8	30.7662	29.9726	30.5562	32.4203	30.325	34.6428	33.843	33.7597	32.0704	34.8488	33.3251	38.8498	3.38412	3.4791	1.56237	0.542358	0.231153	1.09503	0.313079	0.86227	2.78821	0.920328	0.457702	1.0886
367	374	352	359	LVVDGVKL	2	841.527	421.77	5.75	35.0782	34.5626	36.0342	37.384	36.6384	40.6698	35.2783	35.9393	34.1634	36.5764	35.9138	40.3777	2.02226	2.53489	1.32311	0.25526	0.69985	1.98297	0.667685	0.109052	2.77835	0.140697	0.304589	0.484692
375	396	360	381	MVEMEKKLEKGQSIDDMIPAQK	3	2547.27	850.098	5.35	32.0267	36.0125	43.5611	46.6093	46.3556	46.3016	32.5818	35.9431	42.2395	44.8944	45.7143	44.9269	1.70842	1.11394	1.21778	0.268023	0.594269	0.552486	0.43099	0.419633	0.192727	0.518811	0.707075	0.264899
375	396	360	381	MVEMEKKLEKGQSIDDMIPAQK	5	2547.27	510.462	5.35	31.6325	35.6111	43.0354	45.9422	45.7746	45.8711	32.808	35.8334	41.8602	44.4559	45.0892	44.5209	1.49431	0.882414	0.548085	0.230009	0.832187	0.647716	0.42406	0.298759	0.529427	0.472372	0.782352	0.382647
378	396	363	381	MEKKLEKGQSIDDMIPAQK	2	2188.12	1095.07	5.22	28.8766	32.6133	40.7753	43.7877	44.4995	42.8244	29.7237	33.0646	40.286	42.6965	43.1441	42.7577	1.86513	0.885153	1.16837	0.412988	0.904637	0.197558	0.906351	0.779138	0.528621	0.102978	0.264436	0.31928
378	396	363	381	MEKKLEKGQSIDDMIPAQK	3	2188.12	730.381	5.155	27.0503	31.4454	39.1267	41.6783	42.3136	40.2664	28.7538	32.4023	39.9354	42.4217	42.7689	42.0573	2.12046	1.03325	1.08837	0.834008	0.304123	0.929188	0.447699	0.536771	0.172066	0.111259	0.107426	0.0885967
378	396	363	381	MEKKLEKGQSIDDMIPAQK	5	2188.12	438.631	5.22	22.6483	26.6235	34.8826	36.6243	39.0422	37.5523	28.8026	32.3871	39.7581	42.1821	42.4325	41.2892	2.66354	4.0377	2.42281	1.44135	0.734863	1.28327	0.376024	0.585543	0.475455	0.42134	0.186992	0.5351
379	396	364	381	EKKLEKGQSIDDMIPAQK	3	2057.08	686.701	5.155	29.1395	34.034	42.7454	45.8191	46.8601	44.611	31.0704	35.484	43.165	45.6024	45.3208	44.5199	1.5408	1.31699	0.632797	0.761672	1.39272	2.44116	1.02948	0.606018	1.04512	0.922109	0.41103	0.615928
